# Supplementary material
Source: PubMed Central journal article supplement (PMC33271)

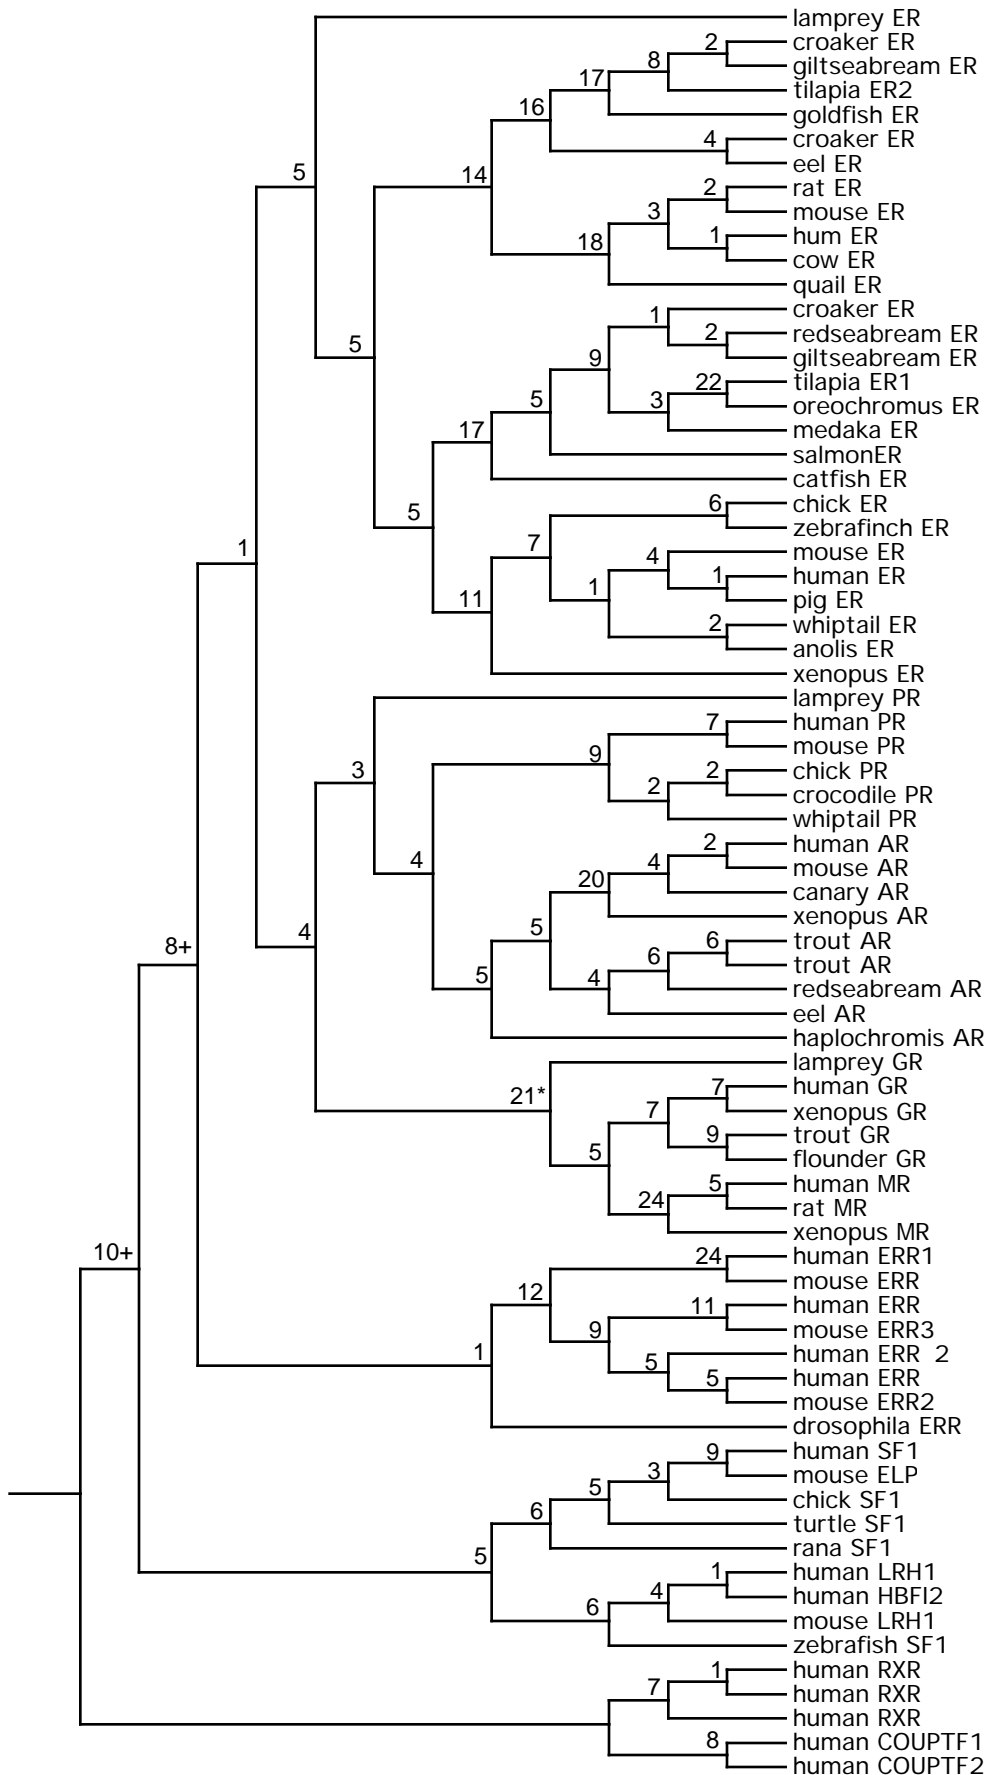

Supplement: pnas_091553298_3.pdf [file pnas_091553298_3.pdf]
